# Supplementary material for: Titanium nitride as an alternative and reusable plasmonic substrate for fluorescence coupling
Source: Royal Society of Chemistry journal article supplement (doi:10.1039/d1cp05822c), 2022-01-01
Supplement: d1cp05822c1.pdf [file d1cp05822c1.pdf]

## **Electronic Supporting Information**

# Titanium Nitride as an Alternative and Reusable Plasmonic Substrate for Fluorescence Coupling

Prabhat Mishra<sup>a,d</sup>, Anil K. Debnath<sup>b,d</sup>, and Sharmistha Dutta Choudhury<sup>c,d,\*</sup>

<sup>a</sup>Materials Processing & Corrosion Engineering Division, Bhabha Atomic Research Centre, Mumbai  
400 085, India.

<sup>b</sup>Technical Physics Division, Bhabha Atomic Research Centre, Mumbai 400 085, India.

<sup>c</sup>Radiation & Photochemistry Division, Bhabha Atomic Research Centre, Mumbai 400 085, India.

<sup>d</sup>Homi Bhabha National Institute, Training School Complex, Anushaktinagar, Mumbai 400094,  
India.

### **Corresponding Author**

\*E-mail: sharmidc@barc.gov.in; Telephone: 91-2 2-25595097; Fax: 91-22-25505151

### **ORCID ID**

Sharmistha Dutta Choudhury: 0000-0003-4000-4930

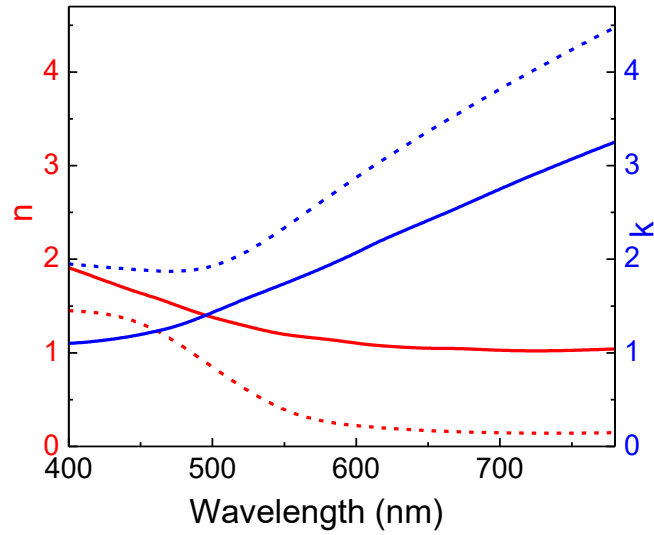

**Fig. S1.** Variation in the complex refractive index ( $n+ik$ ) of TiN (solid) and Au (dash) with wavelength.<sup>1,2</sup> The refractive index is related to the complex dielectric permittivity ( $\epsilon_r+i\epsilon_{im}$ ) of the materials as:  $\epsilon_r=n^2-k^2$  and  $\epsilon_{im}=2nk$ .

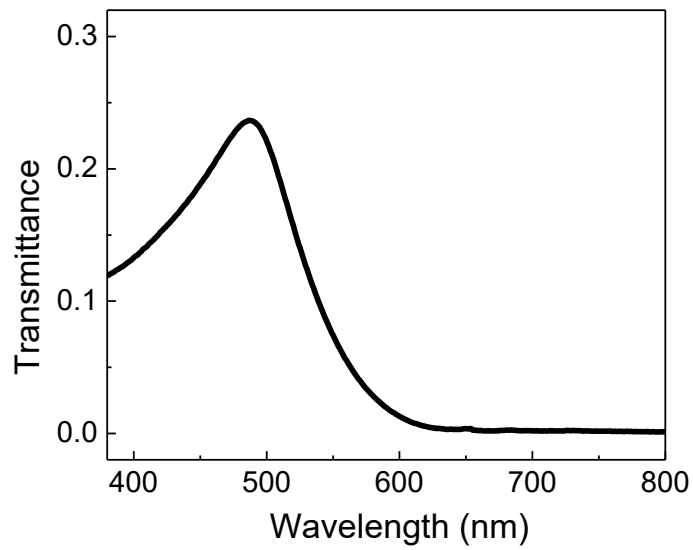

**Fig. S2.** Transmittance spectrum of Au thin film deposited on glass substrate.

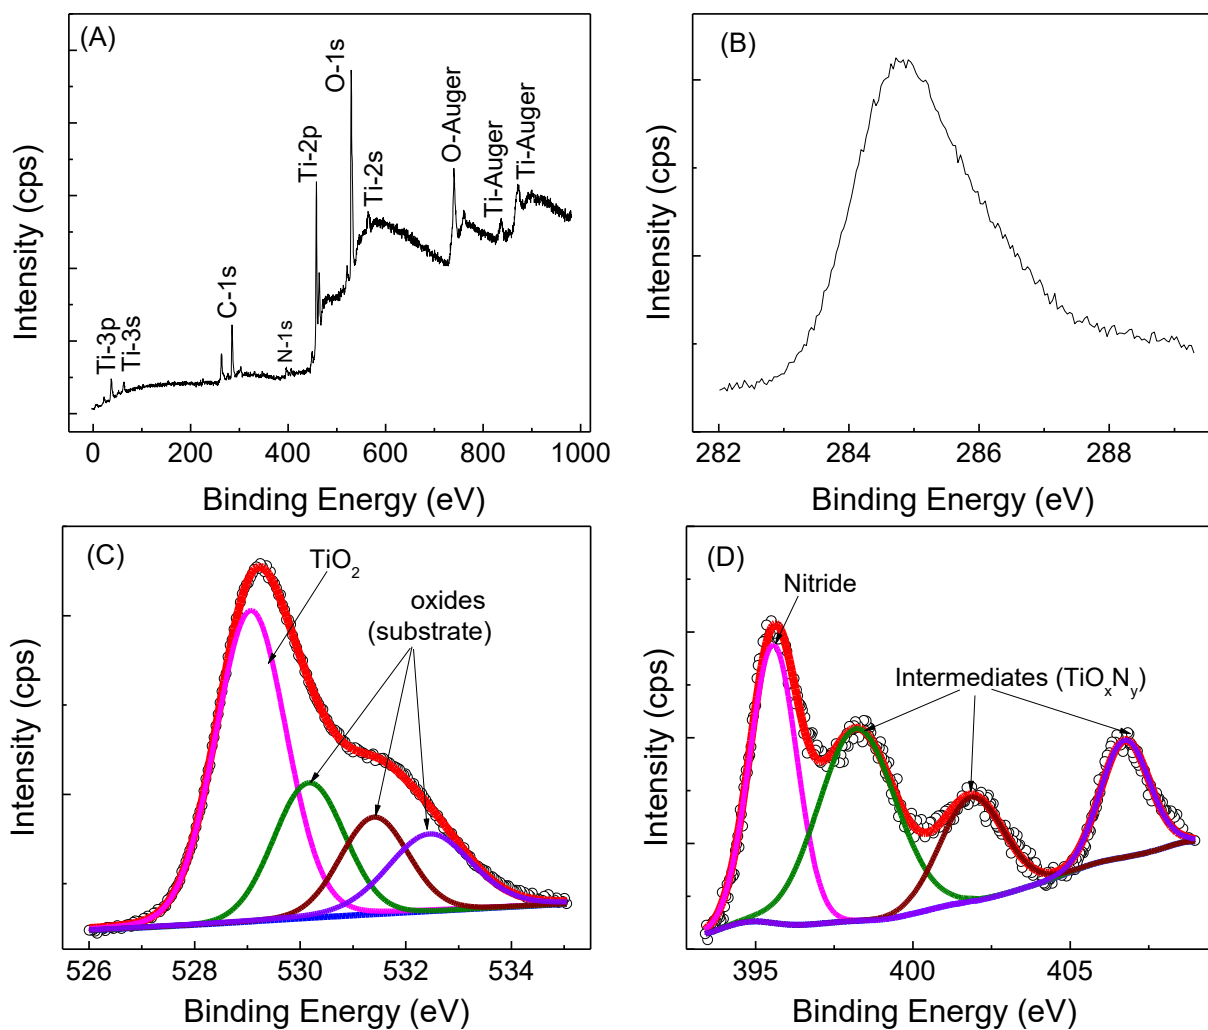

**Fig. S3.** XPS survey spectrum (A) and core level C 1s (B), O 1s (C) and N 1s (D) spectra of TiN film on glass substrate. The open circles are data points, red line is the fitted curve, and other coloured lines are the deconvoluted peaks for different components.

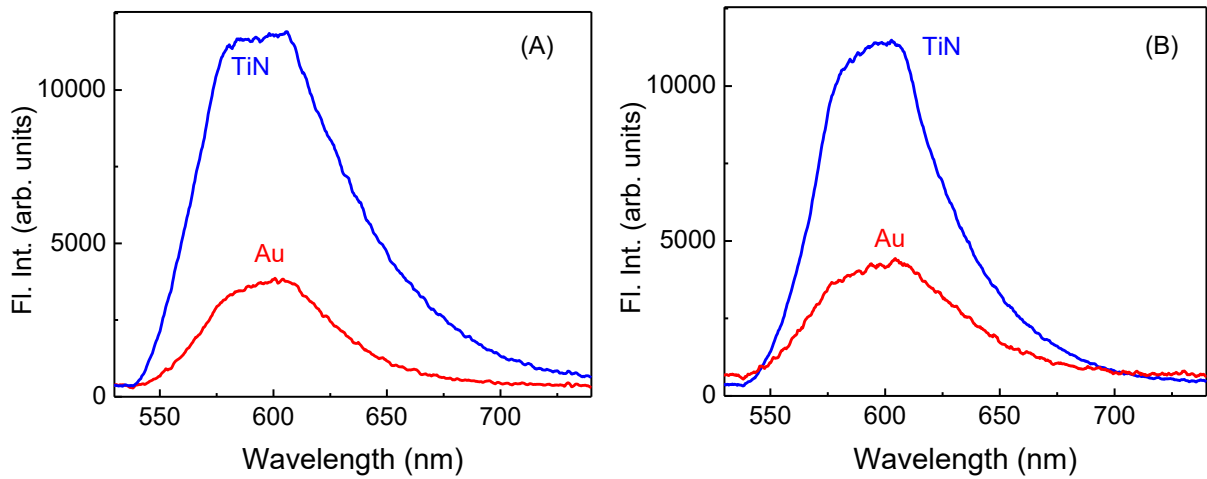

**Fig. S4.** (A) P-polarized emission spectra of NR coupled with TiN-PMMA (0.5% w/v) and Au-PMMA (0.5% w/v) at 60°. (A) S-polarized emission spectra of NR coupled with TiN-PMMA (1% w/v) and Au-PMMA (1% w/v) at 45°.

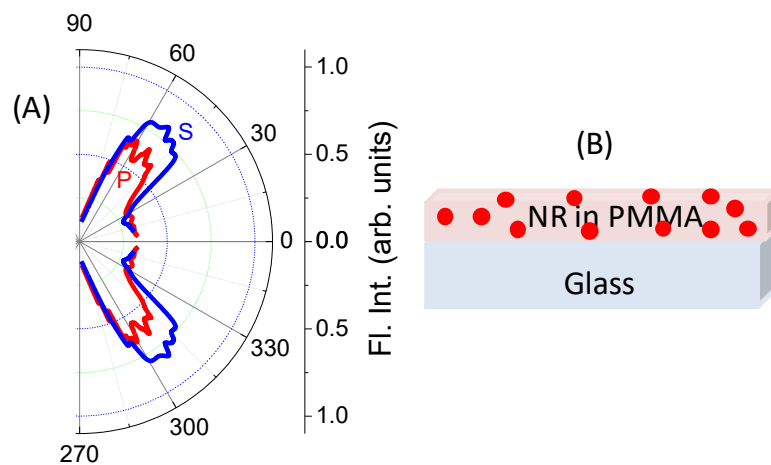

**Fig. S5.** (A) Angular emission distribution of NR on glass slide coated with PMMA layer (1% w/v). (B) Schematic of the substrate.

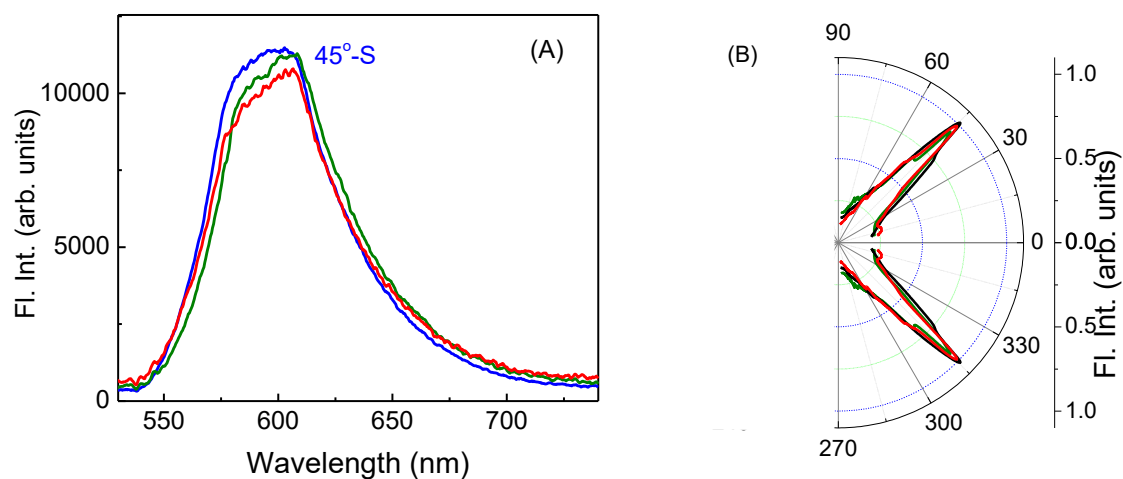

**Fig. S6.** (A) Superimposed emission spectra of NR coupled with TiN-PMMA (1.0% w/v) substrate reused for three repeated measurements after washing and recoating with the dye layer. (B) Superimposed angular emission distributions of NR on TiN-PMMA (1.0% w/v) substrate reused for three repeated measurements.

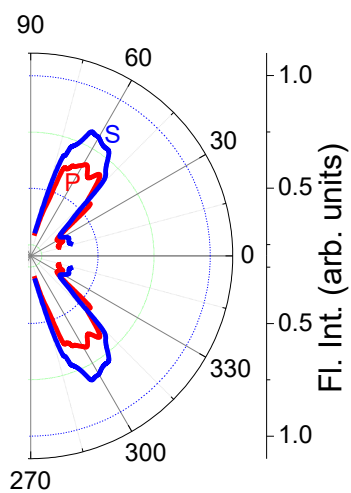

**Fig. S7.** Angular emission distribution of TMPyP on glass slide coated with PVA layer (5% w/v).

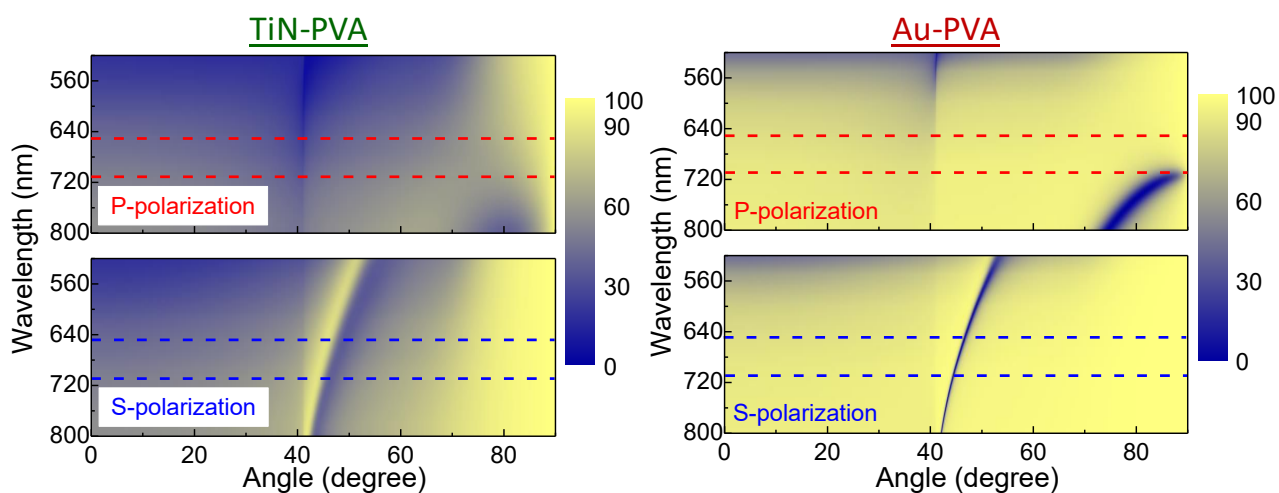

**Fig. S8.** Calculated reflectivity dispersion diagrams for TiN-PVA and Au-PVA substrates with PVA layer thickness of 175 nm. The emission maxima of TMPyP are indicated by dashed lines.

## References

1. P. Patsalas, N. Kalfagiannis and S. Kassavetis, Optical Properties and Plasmonic Performance of Titanium Nitride, *Materials*, 2015, **8**, 3128–3154.
2. *CRC Handbook of Chemistry and Physics*, 89 edn., Taylor & Francis Group, Boca Raton, 2008.
